# Supplementary material for: Polymerization of long chain [meth]acrylates by Cu(0)-mediated and catalytic chain transfer polymerisation (CCTP): high fidelity end group incorporation and modification
Source: Royal Society of Chemistry journal article supplement (doi:10.1039/c3py00618b), 2013-01-01
Supplement: c3py00618b.pdf [file c3py00618b.pdf]

## Supporting Information

for

# **Polymerization of long chain [meth]acrylates by Cu(0)-mediated and catalytic chain transfer polymerisation (CCTP): High fidelity end group incorporation and modification**

*Athina Anastasaki,<sup>a</sup> Christopher Waldron,<sup>a</sup> Vasiliki Nikolaou,<sup>a</sup> Paul Wilson,<sup>a</sup> Ronan  
McHale,<sup>a</sup> Tim Smith<sup>b</sup> and David M. Haddleton<sup>a\*</sup>*

<sup>a</sup>Department of Chemistry, University of Warwick, Coventry, CV4 7AL, UK.

Email : [D.M.Haddleton@warwick.ac.uk](mailto:D.M.Haddleton@warwick.ac.uk)

## Supplementary Figures

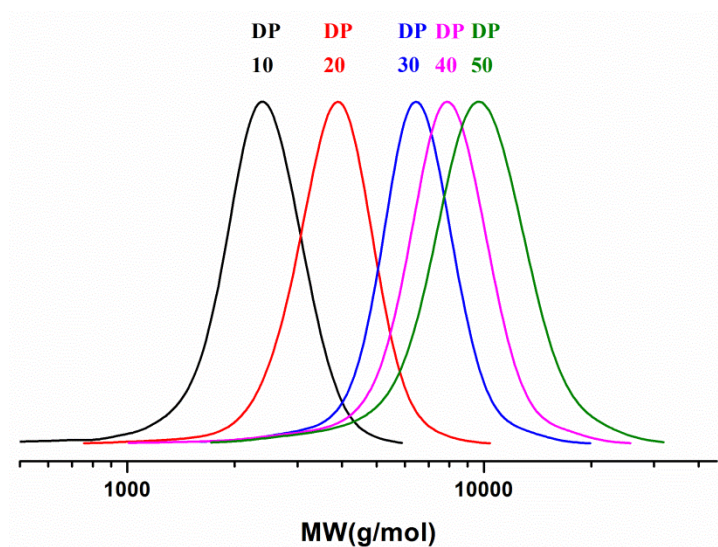

Fig S1. GPC analysis of poly(LA) with DP = 10-50 in IPA (cf table 1 in the manuscript).

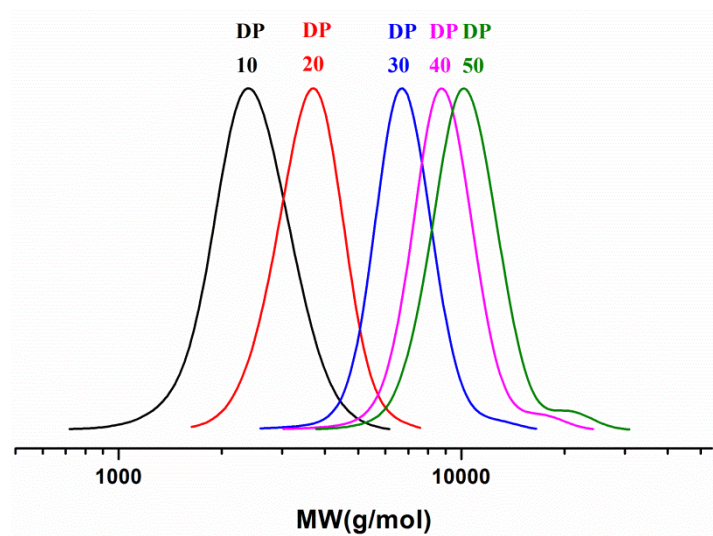

Fig S2. GPC analysis of poly(LA) with DP = 10-50 in toluene/methanol (80/20 v/v) (cf table 1 in the manuscript).

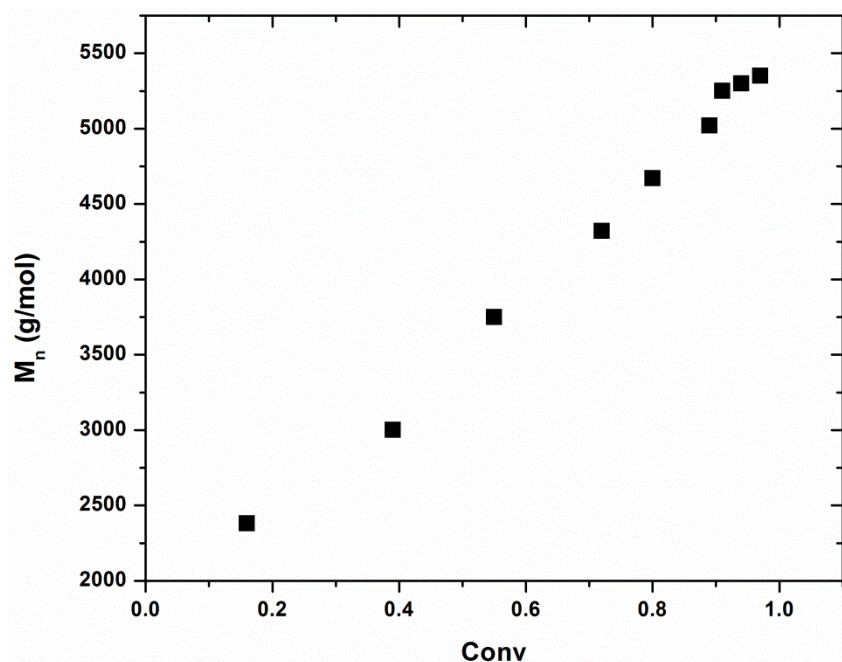

Fig S3. Linear evolution of molecular weight with conversion during the polymerization of LA in toluene/methanol (80/20 v/v) solvent system.

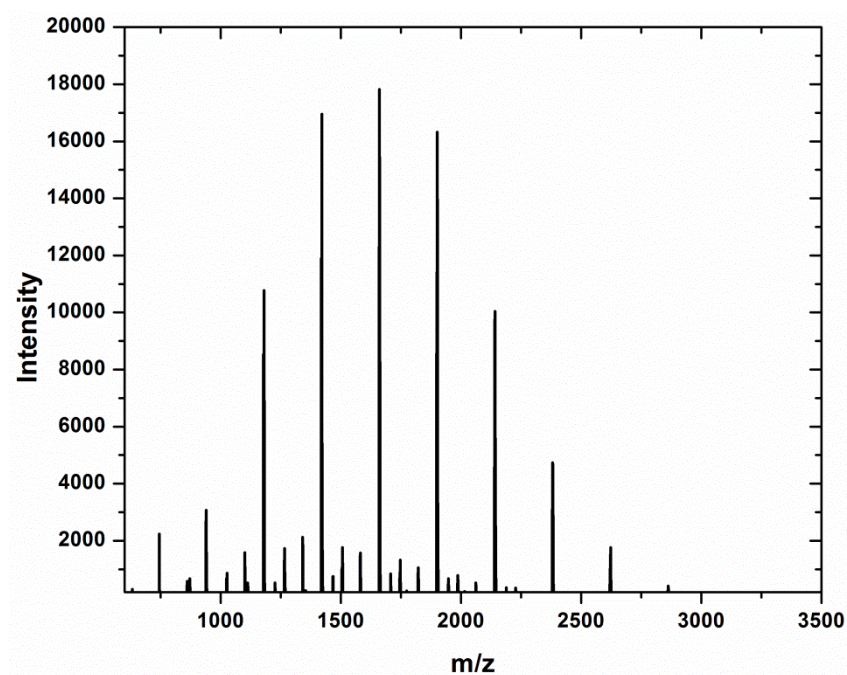

Fig S4a. MALDI-TOF-MS of poly(LA) synthesised in the toluene/methanol (80/20 v/v) solvent system.

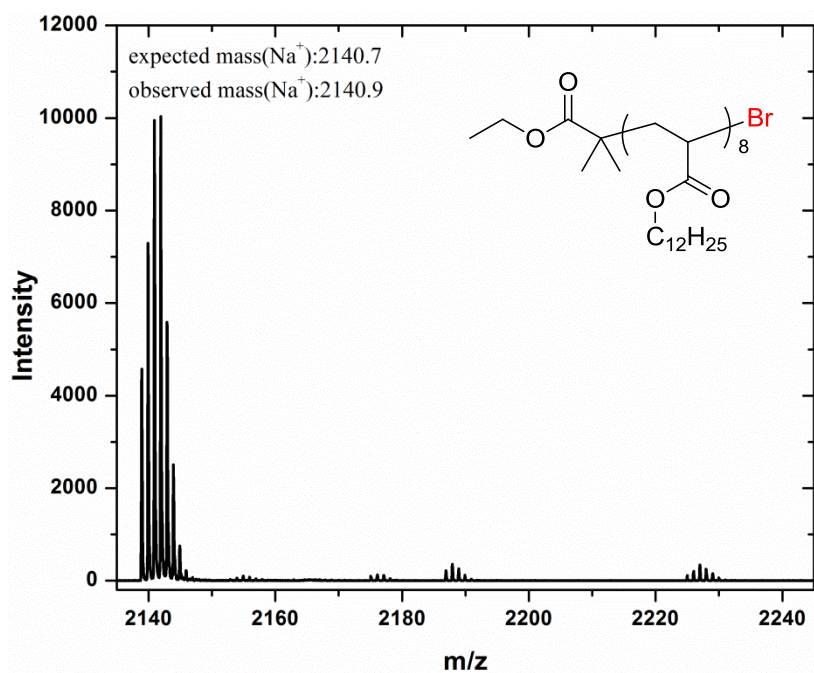

Fig S4b. Zoomed MALDI-TOF-MS of poly(LA) synthesised in the toluene/methanol (80/20 v/v) solvent system displaying near perfect  $\omega$ -bromo end group fidelity.

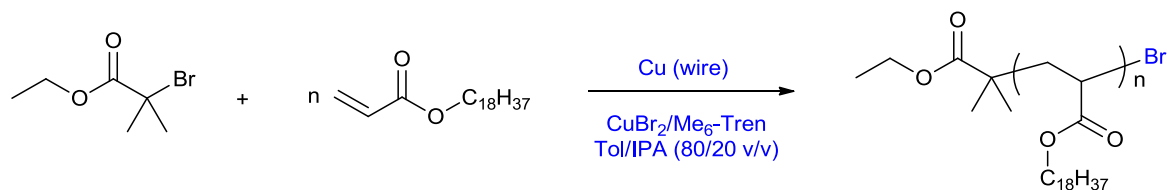

Scheme S1: Cu(0)-mediated polymerization of stearyl acrylate (SA).

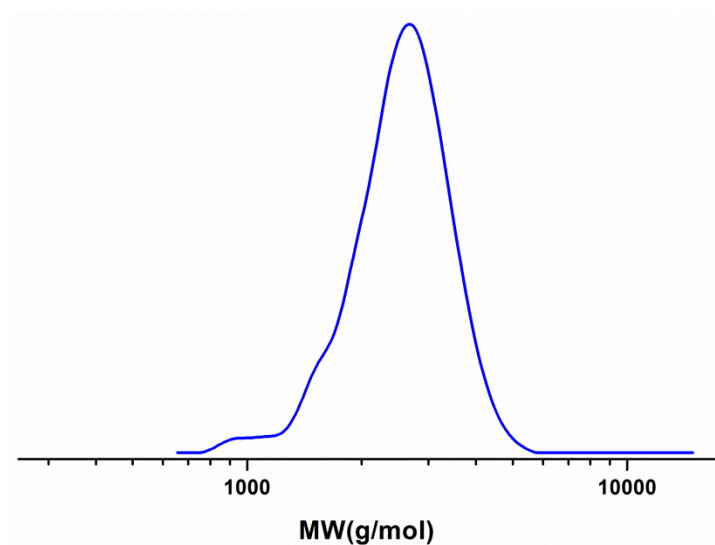

Fig S5. GPC trace of poly(stearyl acrylate) in  $\text{CHCl}_3$ .  $M_n = 2500$   $\text{PDI} = 1.09$

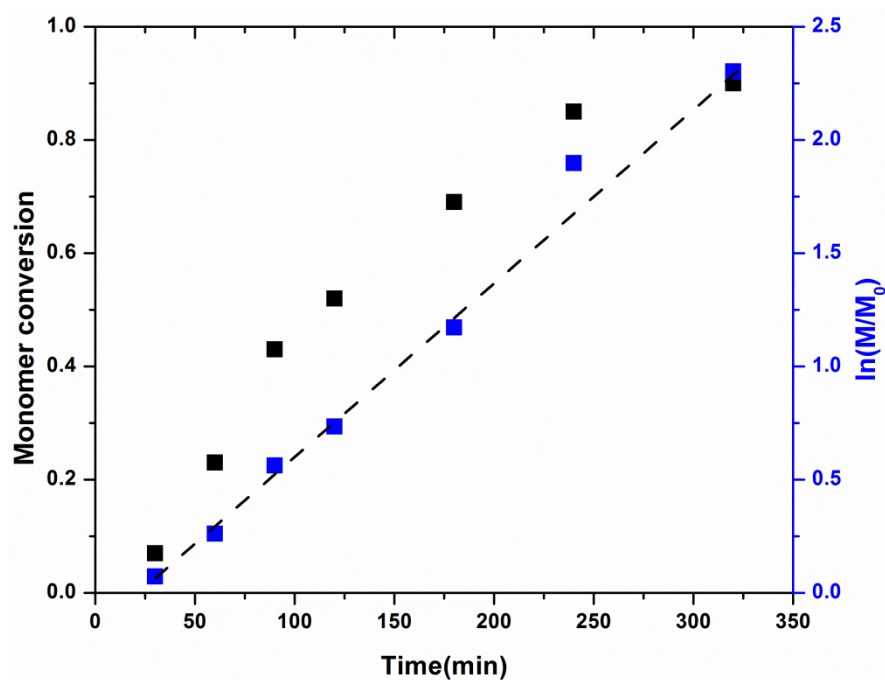

Fig S6a. First order kinetics obtained for the Cu(0)-mediated polymerization of stearyl acrylate.

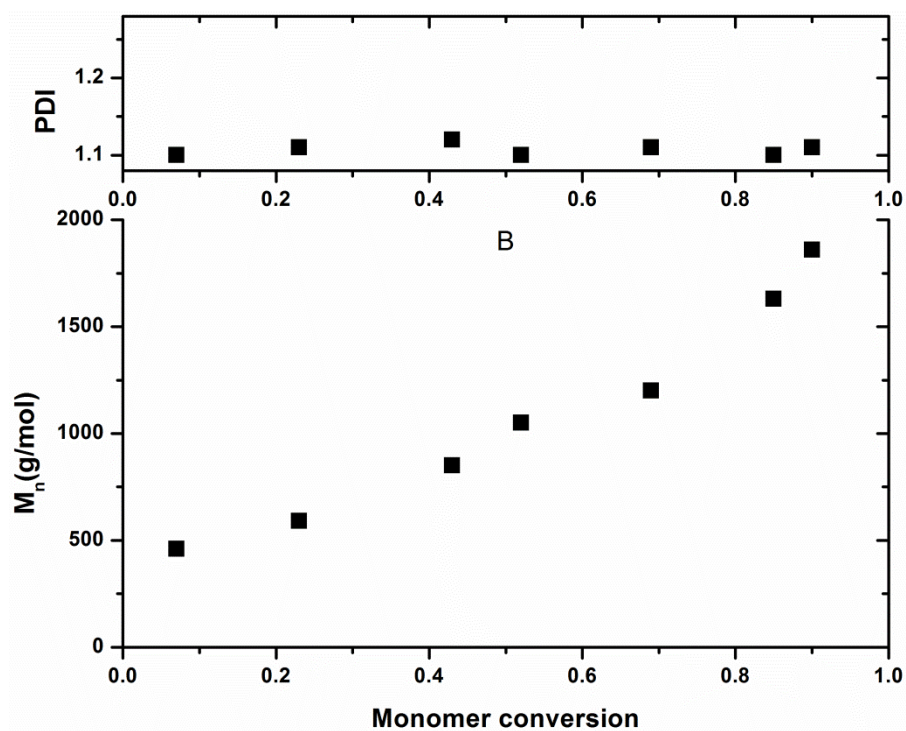

Fig S6b. Molecular weight and PDI evolution during the Cu(0)-mediated polymerization of stearyl acrylate.



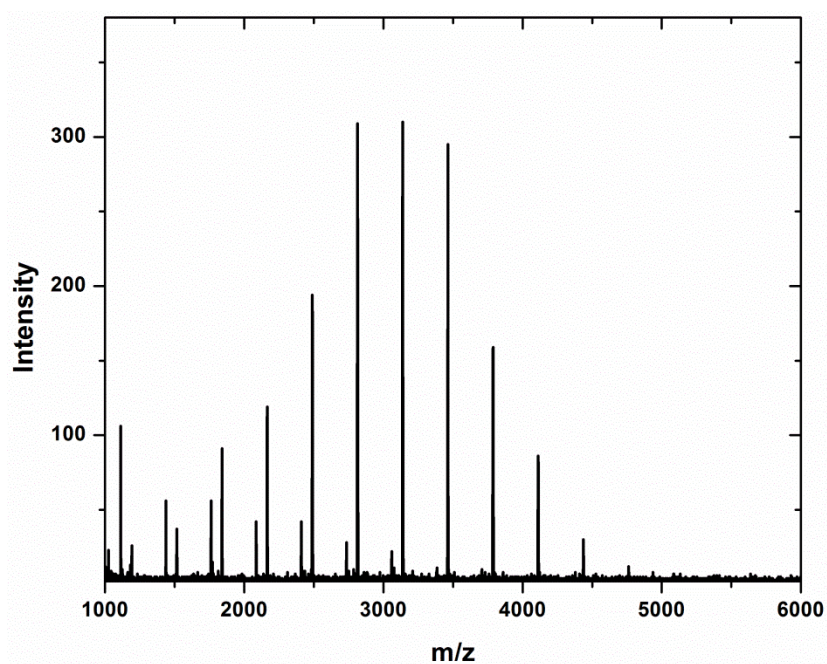

Fig S7a. MALDI-TOF-MS of poly(SA) synthesised in the toluene/IPA (80/20 v/v) solvent system.

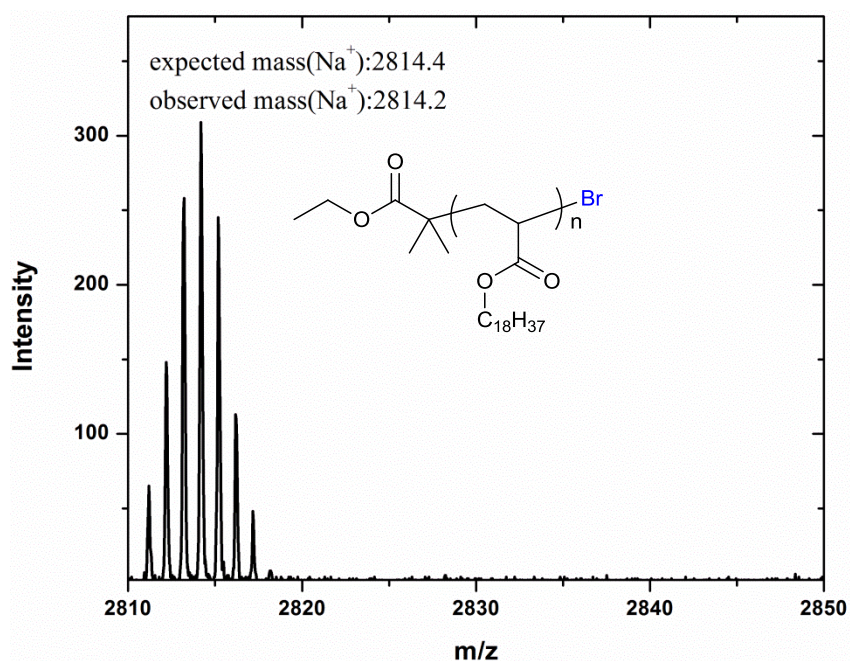

Fig S7b. Zoomed MALDI-TOF-MS of poly(SA) synthesised in the toluene/IPA (80/20 v/v) solvent system displaying near perfect  $\omega$ -bromo end group fidelity.

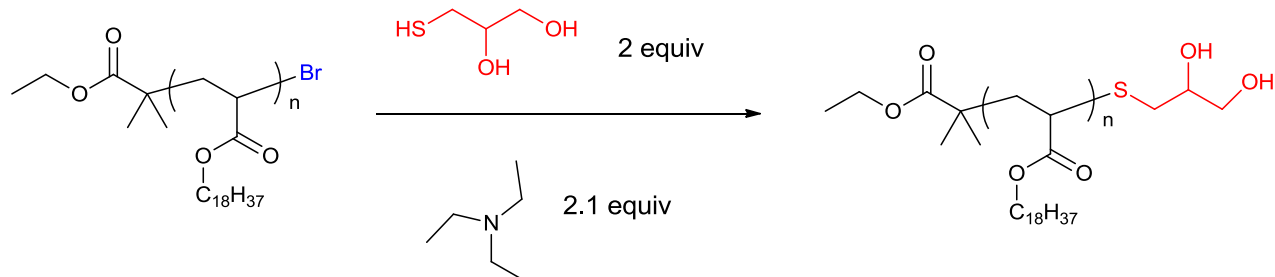

**Scheme S2: Nucleophilic thio-bromo substitution of poly(SA).**

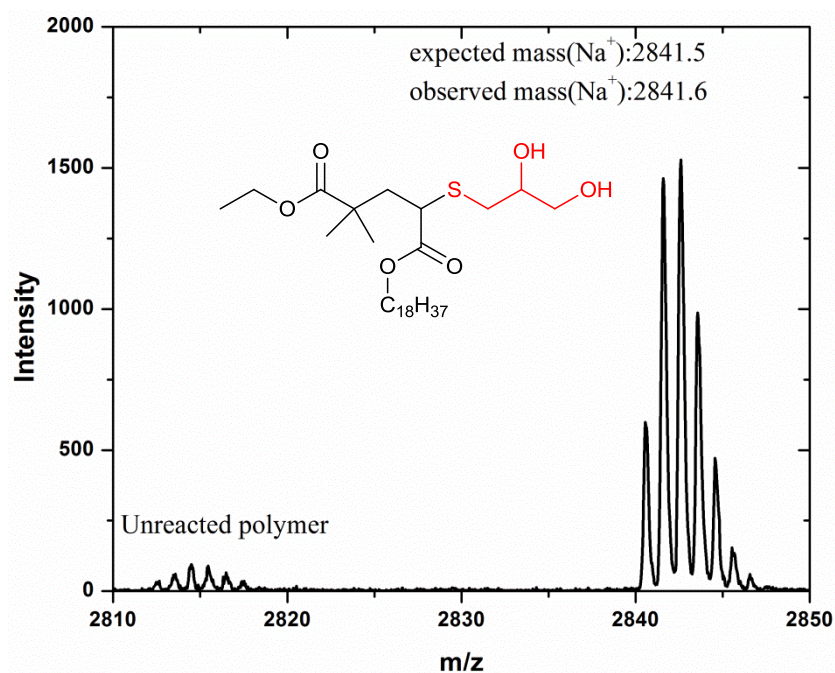

**Fig S8. Zoomed MALDI-TOF-MS of thioglycerol functionalised poly(SA) .**
